# Supplementary material for: Peer review of the pesticide risk assessment of the active substance quartz sand
Source: PubMed Central journal article supplement (PMC9486493; doi:10.2903/j.efsa.2022.7552), 2022-09-20
Supplement: EFS2-20-e07552-s001.pdf [file EFS2-20-e07552-s001.pdf]

Appendix to:

EFSA (European Food Safety Authority), 2022. Conclusion on the peer review of the pesticide risk assessment of the active substance quartz sand. EFSA Journal 2022;20(9):7552, 37 pp. doi:10.2903/j.efsa.2022.7552

© European Food Safety Authority, 2022

## Appendix B - List of end points for the active substance and the representative formulation

### Identity, Physical and Chemical Properties, Details of Uses, Further Information (Regulation (EU) N° 283/2013, Annex Part A, points 1.3 and 3.2)

|                                    |                                           |
|------------------------------------|-------------------------------------------|
| Active substance (ISO Common Name) | Quartz sand (there is no ISO common name) |
| Function (e.g. fungicide)          | Repellent                                 |
| Rapporteur Member State            | Latvia                                    |
| Co-rapporteur Member State         | Romania                                   |

### Identity (Regulation (EU) N° 283/2013, Annex Part A, point 1)

|                                                                                                                                           |                                                                                                                                                                                                                                                                          |
|-------------------------------------------------------------------------------------------------------------------------------------------|--------------------------------------------------------------------------------------------------------------------------------------------------------------------------------------------------------------------------------------------------------------------------|
| Chemical name (IUPAC)                                                                                                                     | 1) Silicon dioxide<br>2) Quartz                                                                                                                                                                                                                                          |
| Chemical name (CA)                                                                                                                        | 1) Silicon dioxide<br>2) Quartz                                                                                                                                                                                                                                          |
| CIPAC No                                                                                                                                  | 855                                                                                                                                                                                                                                                                      |
| CAS No                                                                                                                                    | 1) 7631-86-9<br>2) 14808-60-7                                                                                                                                                                                                                                            |
| EC No (EINECS or ELINCS)                                                                                                                  | 1) 231-545-4<br>2) 238-878-4                                                                                                                                                                                                                                             |
| FAO Specification (including year of publication)                                                                                         | not applicable                                                                                                                                                                                                                                                           |
| Minimum purity of the active substance as manufactured                                                                                    | The minimum purity of quartz sand technical is 915 g/kg according to Regulation (EC) No. 540/2011.                                                                                                                                                                       |
| Identity of relevant impurities (of toxicological, ecotoxicological and/or environmental concern) in the active substance as manufactured | Max. 0.1% of particles of crystalline silica with particle diameter $\leq 10 \mu\text{m}$ .                                                                                                                                                                              |
| Location of the (proposed) reference specification (for significant impurities)                                                           | <i>RAR Volume 4, Avenarius-Agro GmbH and Cheminova Deutschland GmbH &amp; Co. KG (May / 2022)*</i><br><i>RAR Volume 4, Flügel GmbH (May / 2022)*</i><br><i>RAR Volume 4, NeraAgro, spol. s r.o. (May / 2022)*</i><br><i>RAR Volume 4, DCR Sp. z o.o. (March / 2022)*</i> |

Molecular formula

\*Following the Pesticide Peer Review TC 73, it was unanimously agreed to lower - from 50 to 10  $\mu\text{m}$  -the size of the relevant impurity crystalline silica particles that can be present in quartz sand with a maximum limit of 0.1% w/w.

Molar mass

 $\text{SiO}_2$ 

Structural formula

60.08 g/mol

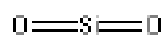

**Physical and chemical properties (Regulation (EU) N° 283/2013, Annex Part A, point 2)**

|                                                                     |                                                                                                                                                               |
|---------------------------------------------------------------------|---------------------------------------------------------------------------------------------------------------------------------------------------------------|
| Melting point (state purity)                                        | >410°C (purified, SiO <sub>2</sub> )<br>1610°C (natural quartz SiO <sub>2</sub> )<br>1713°C (quartz SiO <sub>2</sub> )<br>1710°C (silica, crystalline quartz) |
| Boiling point (state purity)                                        | >410°C (purified, SiO <sub>2</sub> )<br>2230°C (natural quartz SiO <sub>2</sub> )<br>2230°C (quartz SiO <sub>2</sub> )<br>2230°C (silica, crystalline quartz) |
| Temperature of decomposition (state purity)                         | Not relevant                                                                                                                                                  |
| Appearance (state purity)                                           | Solid, grainy, white/grey/brown, odourless (quartz sand).<br>Transparent tasteless crystals or amorphous powder (silicon dioxide).                            |
| Vapour pressure (state temperature, state purity)                   | Vapour pressure:<br>1350 Pa at 1732°C (natural quartz)<br>1333 Pa at 1732°C (crystalline quartz)<br>Volatility is not required.                               |
| Henry's law constant (state temperature)                            | Not relevant                                                                                                                                                  |
| Solubility in water (state temperature, state purity and pH)        | Insoluble in water.                                                                                                                                           |
| Solubility in organic solvents (state temperature, state purity)    | Insoluble in organic solvents.                                                                                                                                |
| Surface tension (state concentration and temperature, state purity) | Not relevant                                                                                                                                                  |
| Partition coefficient (state temperature, pH and purity)            | Not applicable. Quartz sand is insoluble in water and organic solvents.                                                                                       |
| Dissociation constant (state purity)                                | Not applicable                                                                                                                                                |
| UV/VIS absorption (max.) incl. $\epsilon$ (state purity, pH)        | No peaks were identified in the UV/VIS spectrum.<br>No peak was identified in the UV/VIS spectrum above a wavelength of 290 nm.                               |
| Flammability (state purity)                                         | Quartz is not flammable and auto-flammable                                                                                                                    |
| Explosive properties (state purity)                                 | Not applicable                                                                                                                                                |
| Oxidising properties (state purity)                                 | Not oxidizing                                                                                                                                                 |

**Summary of representative uses evaluated, for which all risk assessments needed to be completed (name of active substance or the respective variant)**  
**(Regulation (EU) N° 284/2013, Annex Part A, points 3, 4)**

| Crop and/or situation (a)                        | Member State or Country | Product name  | F G or I (b) | Pests or Group of pests controlled (c)                                                                                                                                                                     | Preparation |                | Application                                     |                                                  |                    |                                    | Application rate per treatment |                    |                                                                         | PHI (days) (m) | Remarks                                                                                                                                                     |
|--------------------------------------------------|-------------------------|---------------|--------------|------------------------------------------------------------------------------------------------------------------------------------------------------------------------------------------------------------|-------------|----------------|-------------------------------------------------|--------------------------------------------------|--------------------|------------------------------------|--------------------------------|--------------------|-------------------------------------------------------------------------|----------------|-------------------------------------------------------------------------------------------------------------------------------------------------------------|
|                                                  |                         |               |              |                                                                                                                                                                                                            | Type (d-f)  | Conc. a.s. (i) | method kind (f-h)                               | range of growth stages & season (j)              | number min-max (k) | Interval between application (min) | kg a.s./hL min-max (l)         | Water L/ha min-max | kg a.s./ha min-max (l)                                                  |                |                                                                                                                                                             |
| Deciduous and coniferous trees in forestry 3FORC | CEU, NEU, SEU           | Repento 16 PA | F            | ruminant animals:<br>-deer family 1CERVF ( <i>Cervidae</i> )<br>-roe family CAPRCA ( <i>Capreolus Capreolus</i> ),<br>-fallow deer DAMADA ( <i>Dama dama</i> )<br>-lagomorphs 1LAGOO ( <i>Lagomorpha</i> ) | PA          | 300            | Coating manually with special brush or glove    | Young shoots, 2-5 years old, autumn (Sept.-Nov.) | a) 1<br>b) 1       | -                                  | -                              | -                  | a) 3 - 4.5 kg/1000 plants<br>b) 3 - 4.5 kg/1000 plants                  | Not relevant   | Undiluted application; the application rate per ha depends on the number of trees which were grown per ha since the application is a single plant treatment |
| Deciduous and coniferous trees in forestry 3FORC | EU central              | Wöbra         | F            | Game repellent: CERVSP ( <i>Cervus sp.</i> ), CERVNI ( <i>Cervus nippon</i> ), DAMADA ( <i>Dama dama</i> )                                                                                                 | PA          | 475:2          | painting with brush: trunks of individual trees | all-season                                       | a) 1<br>b) 1       | -                                  | -                              | -                  | a) 190.08 kg/ha<br>b) 190.08 kg/ha<br>Here 1000 trees/ha are considered | Not relevant   | Undiluted application; the application rate per ha depends on the number of trees which were grown per ha since the application is a single plant treatment |
| Deciduous and coniferous trees in forestry 3FORC | EU central              | Wöbra         | F            | Game repellent: CASTFI ( <i>Castor fiber</i> )                                                                                                                                                             | PA          | 475:2          | painting with brush: trunks of individual       | all-season                                       | a) 1<br>b) 1       | -                                  | -                              | -                  | a) 118.80 kg/ha<br>b) 118.80 kg/ha                                      | Not relevant   | Undiluted application; the application rate per ha depends on the number of trees which were grown per ha since the application is a single plant treatment |

| Crop and/or situation (a)         | Member State or Country | Product name | F G or I (b) | Pests or Group of pests controlled (c)                                                                            | Preparation |                | Application                                     |                                     |                    |                                    | Application rate per treatment |                    |                                                                         | PHI (days) (m)                    | Remarks                                                                                                                                                                                                         |
|-----------------------------------|-------------------------|--------------|--------------|-------------------------------------------------------------------------------------------------------------------|-------------|----------------|-------------------------------------------------|-------------------------------------|--------------------|------------------------------------|--------------------------------|--------------------|-------------------------------------------------------------------------|-----------------------------------|-----------------------------------------------------------------------------------------------------------------------------------------------------------------------------------------------------------------|
|                                   |                         |              |              |                                                                                                                   | Type (d-f)  | Conc. a.s. (i) | method kind (f-h)                               | range of growth stages & season (j) | number min-max (k) | Interval between application (min) | kg a.s./hL min-max (l)         | Water L/ha min-max | kg a.s./ha min-max (l)                                                  |                                   |                                                                                                                                                                                                                 |
|                                   |                         |              |              |                                                                                                                   |             |                | ual trees                                       |                                     |                    |                                    |                                |                    |                                                                         | Here 1000 trees/ha are considered |                                                                                                                                                                                                                 |
| Orchard 3FRUC                     | EU central              | Wöbra        | F            | Game repellent: CERVSP ( <i>Cervus sp.</i> ), CERVNI ( <i>Cervus nippon</i> ), DAMADA ( <i>Dama dama</i> )        | PA          | 475.2          | painting with brush: trunks of individual trees | all-season                          | a) 1<br>b) 1       | -                                  | -                              | -                  | a) 190.08 kg/ha<br>b) 190.08 kg/ha<br>Here 1000 trees/ha are considered | Not relevant                      | Undiluted application; the application rate per ha depends on the number of trees which were grown per ha since the application is a single plant treatment.<br><br>professional and non-professional field use |
| Orchard 3FRUC                     | EU central              | Wöbra        | F            | Game repellent: CASTFI (Castor fiber), LEPUEU ( <i>Lepus europaeus</i> ), ORYTCU ( <i>Oryctolagus cuniculus</i> ) | PA          | 475.2          | painting with brush: trunks of individual trees | all-season                          | a) 1<br>b) 1       | -                                  | -                              | -                  | a) 118.80 kg/ha<br>b) 118.80 kg/ha<br>Here 1000 trees/ha are considered | Not relevant                      | Undiluted application; the application rate per ha depends on the number of trees which were grown per ha since the application is a single plant treatment.<br><br>professional and non-professional field use |
| Ornamental shrubs and trees 3ORTC | EU central              | Wöbra        | F            | Game repellent: CASTFI (Castor fiber), LEPUEU ( <i>Lepus europaeus</i> ), ORYTCU ( <i>Oryctolagus cuniculus</i> ) | PA          | 475.2          | painting with brush: trunks of individual trees | all-season                          | a) 1<br>b) 1       | -                                  | -                              | -                  | a) 118.80 kg/ha<br>b) 118.80 kg/ha<br>Here 1000 trees/ha are considered | Not relevant                      | Undiluted application; the application rate per ha depends on the number of trees which were grown per ha since the application is a single plant treatment.<br><br>professional and non-professional field use |

| Crop and/or situation (a)                        | Member State or Country | Product name   | F G or I (b) | Pests or Group of pests controlled (c)                                                               | Preparation |                | Application                                         |                                     |                    |                                    | Application rate per treatment |                    |                                                          | PHI (days) (m) | Remarks                                                                                                                                                                                              |
|--------------------------------------------------|-------------------------|----------------|--------------|------------------------------------------------------------------------------------------------------|-------------|----------------|-----------------------------------------------------|-------------------------------------|--------------------|------------------------------------|--------------------------------|--------------------|----------------------------------------------------------|----------------|------------------------------------------------------------------------------------------------------------------------------------------------------------------------------------------------------|
|                                                  |                         |                |              |                                                                                                      | Type (d-f)  | Conc. a.s. (i) | method kind (f-h)                                   | range of growth stages & season (j) | number min-max (k) | Interval between application (min) | kg a.s./hL min-max (l)         | Water L/ha min-max | kg a.s./ha min-max (l)                                   |                |                                                                                                                                                                                                      |
| Deciduous and coniferous trees in forestry 3FORC | AT, PL, CZ, HU, RO, SK  | Cervacol Extra | F            | Deer and red deer (against browsing): CERVSP ( <i>Cervus sp.</i> ), CERVEL ( <i>Cervus elaphus</i> ) | PA          | 251            | Coating of undiluted product preferably with gloves | all-season                          | a) 1<br>b) 1       | -                                  | -                              | -                  | a) 0.5-1.3 kg /1000 plants<br>b) 0.5-1.3 kg /1000 plants | Not relevant   | Undiluted application; the application rate per ha depends on the number of trees which were grown per ha since the application is a single plant treatment                                          |
| Deciduous and coniferous trees in forestry 3FORC | PL                      | Cervacol Extra | F            | Deer and red deer (against fraying): CERVSP ( <i>Cervus sp.</i> ), CERVEL ( <i>Cervus elaphus</i> )  | PA          | 251            | Coating of undiluted product preferably with gloves | all-season                          | a) 1<br>b) 1       | -                                  | -                              | -                  | a) 3.5 kg /1000 plants<br>b) 3.5 kg /1000 plants         | Not relevant   | Undiluted application; the application rate per ha depends on the number of trees which were grown per ha since the application is a single plant treatment                                          |
| Deciduous and coniferous trees in forestry 3FORC | LV, EE, DE,             | Cervacol Extra | F            | Deer and red deer (against browsing): CERVSP ( <i>Cervus sp.</i> ), CERVEL ( <i>Cervus elaphus</i> ) | PA          | 251            | Coating of undiluted product preferably with gloves | all-season                          | a) 1<br>b) 1       | -                                  | -                              | -                  | a) 0.8-1 kg /1000 plants<br>b) 0.8-1 kg /1000 plants     | Not relevant   | Undiluted application; the application rate per ha depends on the number of trees which were grown per ha since the application is a single plant treatment                                          |
| Deciduous and coniferous trees in forestry 3FORC | LT                      | Cervacol Extra | F            | Deer and red deer (against browsing): CERVSP ( <i>Cervus sp.</i> ), CERVEL ( <i>Cervus elaphus</i> ) | PA          | 251            | Coating of undiluted product preferably with gloves | all-season                          | a) 1<br>b) 1       | -                                  | -                              | -                  | a) 0.5-0.8 kg /1000 plants<br>b) 0.5-0.8 kg /1000 plants | Not relevant   | Non-professional use 3-4 kg/1000 plants; Undiluted application; the application rate per ha depends on the number of trees which were grown per ha since the application is a single plant treatment |

| Crop and/or situation (a)                                                        | Member State or Country                      | Product name | F G or I (b) | Pests or Group of pests controlled (c)                                                                                                                                        | Preparation |                                                                                    | Application                                     |                                     |                    |                                    | Application rate per treatment |                    |                                                  | PHI (days) (m) | Remarks                                                                                                                                                     |
|----------------------------------------------------------------------------------|----------------------------------------------|--------------|--------------|-------------------------------------------------------------------------------------------------------------------------------------------------------------------------------|-------------|------------------------------------------------------------------------------------|-------------------------------------------------|-------------------------------------|--------------------|------------------------------------|--------------------------------|--------------------|--------------------------------------------------|----------------|-------------------------------------------------------------------------------------------------------------------------------------------------------------|
|                                                                                  |                                              |              |              |                                                                                                                                                                               | Type (d-f)  | Conc. a.s. (i)                                                                     | method kind (f-h)                               | range of growth stages & season (j) | number min-max (k) | Interval between application (min) | kg a.s./hL min-max (l)         | Water L/ha min-max | kg a.s./ha min-max (l)                           |                |                                                                                                                                                             |
| For up to 2 years old seedlings of conifer and deciduous trees in forestry 3FORC | Czech Republic<br>Slovak Republic<br>Germany | Morsuvin     | F            | Ruminant animals:<br>Deer family:<br>CERVEL ( <i>Cervus Elaphus</i> ),<br>Roe family:<br>CAPRCA ( <i>Capreolus Capreolus</i> ),<br>Fallow Deer<br>DAMADA ( <i>Dama dama</i> ) | PA          | 254.8<br>255<br>g/kg of quartz sand<br><br>40<br>g/kg of fat distillation residues | painting with brush: trunks of individual trees | all-season                          | a) 1<br>b) 1       | -                                  | -                              | -                  | a) 4-5 kg /1000 plants<br>b) 4-5 kg /1000 plants | Not relevant   | Undiluted application; the application rate per ha depends on the number of trees which were grown per ha since the application is a single plant treatment |
| More than 2 years old seedlings of conifer and deciduous trees in forestry 3FORC | Czech Republic<br>Slovak Republic<br>Germany | Morsuvin     | F            | Ruminant animals:<br>Deer family:<br>CERVEL ( <i>Cervus Elaphus</i> )<br>Roe family:<br>CAPRCA ( <i>Capreolus Capreolus</i> )<br>Fallow Deer:<br>DAMADA ( <i>Dama dama</i> )  | PA          | 254.8<br>255<br>g/kg of quartz sand<br><br>40<br>g/kg of fat distillation residues | painting with brush: trunks of individual trees | all-season                          | a) 1<br>b) 1       | -                                  | -                              | -                  | a) 5-6 kg /1000 plants<br>b) 5-6 kg /1000 plants | Not relevant   | Undiluted application; the application rate per ha depends on the number of trees which were grown per ha since the application is a single plant treatment |

(a) For crops, the EU and Codex classifications (both) should be taken into account; where relevant, the use situation should be described (e.g. fumigation of a structure)  
 (b) Outdoor or field use (F), greenhouse application (G) or indoor application (I)  
 (c) e.g. biting and sucking insects, soil born insects, foliar fungi, weeds  
 (d) e.g. wettable powder (WP), emulsifiable concentrate (EC), granule (GR)  
 (e) CropLife International Technical Monograph no 2, 6th Edition. Revised May 2008. Catalogue of pesticide  
 (f) All abbreviations used must be explained  
 (g) Method, e.g. high volume spraying, low volume spraying, spreading, dusting, drench  
 (h) Kind, e.g. overall, broadcast, aerial spraying, row, individual plant, between the plant- type of equipment used must be indicated

(i) g/kg or g/L. Normally the rate should be given for the active substance (according to ISO) and not for the variant in order to compare the rate for same active substances used in different variants (e.g. fluoroxypyr). **In certain cases, where only one variant is synthesised, it is more appropriate to give the rate for the variant (e.g. benthialdicarb-isopropyl).**  
 (j) Growth stage range from first to last treatment (BBCH Monograph, Growth Stages of Plants, 1997, Blackwell, ISBN 3-8263-3152-4), including where relevant, information on season at time of application  
 (k) Indicate the minimum and maximum number of applications possible under practical conditions of use  
 (l) The values should be given in g or kg whatever gives the more manageable number (e.g. 200 kg/ha instead of 200 000 g/ha or 12.5 g/ha instead of 0.0125 kg/ha  
 (m) PHI - minimum pre-harvest interval

**Summary of additional intended uses for which MRL applications have been made, that in addition to the uses above, have also been considered in the consumer risk assessment (name of active substance or the respective variant)**  
**Regulation (EC) N° 1107/2009 Article 8.1(g)**

Not relevant



**Further information, Efficacy****Effectiveness (Regulation (EU) N° 284/2013, Annex Part A, point 6.2)**

The representative products containing quartz sand are applied manually with special brush or glove on the plant parts in order to protect against damages caused by ruminant animals: deer family, roe family, fallow deer and lagomorphs in winter. The effect is based on an unpleasant abrasive effect which prevents game to damage the plants. A data gap was identified for efficacy data of the formulation 'Morsuvin®'

**Adverse effects on field crops (Regulation (EU) N° 284/2013, Annex Part A, point 6.4)**

No signs of phytotoxicity of the representative products were visible on coniferous and deciduous trees.

**Observations on other undesirable or unintended side-effects (Regulation (EU) N° 284/2013, Annex Part A, point 6.5)**

A paste-like game repellent and will be paint on the trunks of significant trees which shall be protected against game bark stripping. Thus no adjacent plants or non-target organisms will be affected.

**Groundwater metabolites: Screening for biological activity (SANCO/221/2000-rev.10-final Step 3 a Stage 1)**

Activity against target organism

Not relevant

## Methods of Analysis

### Analytical methods for the active substance (Regulation (EU) N° 283/2013, Annex Part A, point 4.1 and Regulation (EU) N° 284/2013, Annex Part A, point 5.2)

|                                                     |                                                                                                                                                                                                                                                                                                                                                                                                                                                                                                                                                                                                                                                                                                                                                                                                                                                                                                                                                              |
|-----------------------------------------------------|--------------------------------------------------------------------------------------------------------------------------------------------------------------------------------------------------------------------------------------------------------------------------------------------------------------------------------------------------------------------------------------------------------------------------------------------------------------------------------------------------------------------------------------------------------------------------------------------------------------------------------------------------------------------------------------------------------------------------------------------------------------------------------------------------------------------------------------------------------------------------------------------------------------------------------------------------------------|
| Technical a.s. (analytical technique)               | <p>UV/Vis</p> <p>X-ray fluorescence</p> <p>Data gaps were identified for a validated method for the analysis of the quartz sand in the technical active substance as manufactured (relevant for NeraAgro, spol. S r.o. and Task force Avenarius and Cheminova.)</p>                                                                                                                                                                                                                                                                                                                                                                                                                                                                                                                                                                                                                                                                                          |
| Impurities in technical a.s. (analytical technique) | <p>Laser granulometer method</p> <p>Data gaps were identified for a validated analytical method for the determination of the relevant impurity (respirable crystalline silica with particle diameter below 10 µm) in the active substance as manufactured (relevant for DCR Sp. z o.o. and Flügel GmbH) and for validation data for the proposed laser granulometer method for the determination of particle size distribution of the technical quartz sand with a minimum diameter of 10 µm (relevant for NeraAgro, spol. S r.o. and Task force).</p>                                                                                                                                                                                                                                                                                                                                                                                                       |
| Plant protection product (analytical technique)     | <p>Repenol 6 PA</p> <p>The method involves determination of the content of silicon in the form of silicic acid anhydride after isolation of it with an acid solution prepared alloy samples from carbonates of alkali metals using the process of dehydration by evaporation with hydrochloric acid. The silica content is determined gravimetrically as the loss of weight of the solid on treatment with hydrofluoric acid.</p> <p>Wöbra</p> <p>Gravimetric method, by weighing the residues after incineration to a temperature of 550 °C.</p> <p>Cercavol Extra</p> <p>CIPAC MT 185 (wet sieve test)</p> <p>‘Morsuvin®’</p> <p>Gravimetric method, by weighing the residues after incineration to a temperature of 600 °C.</p> <p>The requirement for methods of analysis for monitoring the respirable crystalline silica in the representative formulations has been waived due to negligible inhalation exposure predicted for the proposed uses.</p> |

## Analytical methods for residues (Regulation (EU) N° 283/2013, Annex Part A, point 4.2 & point 7.4.2)

### Residue definitions for monitoring purposes

|                         |      |
|-------------------------|------|
| Food of plant origin    | None |
| Food of animal origin   | None |
| Soil                    | None |
| Sediment                | None |
| Water surface           | None |
| drinking/ground         | None |
| Air                     | None |
| Body fluids and tissues | None |

### Monitoring/Enforcement methods

|                                                                                               |              |
|-----------------------------------------------------------------------------------------------|--------------|
| Food/feed of plant origin (analytical technique and LOQ for methods for monitoring purposes)  | Not required |
| Food/feed of animal origin (analytical technique and LOQ for methods for monitoring purposes) | Not required |
| Soil (analytical technique and LOQ)                                                           | Not required |
| Water (analytical technique and LOQ)                                                          | Not required |
| Air (analytical technique and LOQ)                                                            | Not required |
| Body fluids and tissues (analytical technique and LOQ)                                        | Not required |

## Classification and labelling with regard to physical and chemical data (Regulation (EU) N° 283/2013, Annex Part A, point 10)

|                                                                                                                                                                                                |                   |
|------------------------------------------------------------------------------------------------------------------------------------------------------------------------------------------------|-------------------|
| Substance                                                                                                                                                                                      | Quartz sand       |
| Harmonised classification according to Regulation (EC) No 1272/2008 and its Adaptations to Technical Process [Table 3.1 of Annex VI of Regulation (EC) No 1272/2008 as amended] <sup>1</sup> : | No classification |

<sup>1</sup> Regulation (EC) No 1272/2008 of the European Parliament and of the Council of 16 December 2008 on classification, labelling and packaging of substances and mixtures, amending and repealing Directives 67/548/EEC and 1999/45/EC, and amending Regulation (EC) No 1907/2006. OJ L 353, 31.12.2008, 1-1355.

According to the peer review, criteria for harmonised classification according to Regulation (EC) No 1272/2008 may be met for:

No classification

## Impact on Human and Animal Health

### Absorption, distribution, metabolism and excretion (toxicokinetics) (Regulation (EU) N° 283/2013, Annex Part A, point 5.1)

|                                                             |                                                                                                                              |
|-------------------------------------------------------------|------------------------------------------------------------------------------------------------------------------------------|
| Rate and extent of oral absorption/systemic bioavailability | Negligible due to the intrinsic properties (insoluble and inert) of the active substance.                                    |
| Toxicokinetics                                              | No data available, not needed.                                                                                               |
| Distribution                                                | Negligible due to the intrinsic properties (insoluble and inert) of the active substance.                                    |
| Potential for bioaccumulation                               | No evidence for accumulation.                                                                                                |
| Rate and extent of excretion                                | Ingested silica is eliminated in the faeces; the very limited absorbed fraction (if any) is excreted in urine unmetabolized. |
| Metabolism in animals                                       | Not occurring.                                                                                                               |
| <i>In vitro</i> metabolism                                  | No data available, not needed.                                                                                               |
| Toxicologically relevant compounds (animals and plants)     | No data available, not needed.                                                                                               |
| Toxicologically relevant compounds (environment)            | Crystalline silica (impurity) with particle size $\leq 10 \mu\text{m}$                                                       |

### Acute toxicity (Regulation (EU) N° 283/2013, Annex Part A, point 5.2)

|                                 |                                                                                                                                                            |   |
|---------------------------------|------------------------------------------------------------------------------------------------------------------------------------------------------------|---|
| Rat LD <sub>50</sub> oral       | > 2000 mg/kg bw (supplementary information –studies with amorphous silica).                                                                                | - |
| Rat LD <sub>50</sub> dermal     | > 2000 mg/kg bw (supplementary information –studies with amorphous silica).<br>(supplementary information –studies with crystalline and amorphous silica). | - |
| Rat LC <sub>50</sub> inhalation | > 2.2 mg/L air<br>(supplementary information –studies with amorphous silica).                                                                              | - |
| Skin irritation                 | Not irritating<br>(supplementary information –studies with amorphous SiO <sub>2</sub> ).                                                                   | - |
| Eye irritation                  | Not irritating<br>(supplementary information –studies with amorphous SiO <sub>2</sub> ).                                                                   | - |
| Skin sensitisation              | Not sensitising<br>(supplementary information –studies with amorphous SiO <sub>2</sub> ).                                                                  | - |
| Phototoxicity                   | No data available, not needed.                                                                                                                             | - |

**Short-term toxicity (Regulation (EU) N° 283/2013, Annex Part A, point 5.3)**

|                                |                                                                                                                                                                                                                                                                                                                                                                                   |   |
|--------------------------------|-----------------------------------------------------------------------------------------------------------------------------------------------------------------------------------------------------------------------------------------------------------------------------------------------------------------------------------------------------------------------------------|---|
| Target organ / critical effect | No oral or dermal toxicity data available for crystalline SiO <sub>2</sub> .<br>Inhalation:<br>Rat: lung /inflammatory response, impairment of alveolar macrophage clearance functions, increased incidence of adenocarcinomas and squamous cell carcinomas with crystalline silica.<br>Mouse: silicotic granulomas, and lymphoid cuffing around airways but no malignant tumors. | - |
| Relevant oral NOAEL            | -                                                                                                                                                                                                                                                                                                                                                                                 | - |
| Relevant dermal NOAEL          | -                                                                                                                                                                                                                                                                                                                                                                                 | - |
| Relevant inhalation NOAEL      | Due to the representative uses no exposure by inhalation is expected.                                                                                                                                                                                                                                                                                                             | - |

**Genotoxicity (Regulation (EU) N° 283/2013, Annex Part A, point 5.4)**

|                            |                                                                                                                                                                                                                                                                                                                                                                                 |   |
|----------------------------|---------------------------------------------------------------------------------------------------------------------------------------------------------------------------------------------------------------------------------------------------------------------------------------------------------------------------------------------------------------------------------|---|
| <i>In vitro</i> studies    | No data submitted.                                                                                                                                                                                                                                                                                                                                                              | - |
| <i>In vivo</i> studies     | According to literature data, conflicting results have been obtained with crystalline silica including quartz, which do not allow to confirm or rule out a direct genotoxic mode of action after inhalation exposure.                                                                                                                                                           | - |
| Photomutagenicity          | No data available, not needed.                                                                                                                                                                                                                                                                                                                                                  | - |
| Potential for genotoxicity | Maximum content of particles with diameter below 10 µm in quartz sand should not exceed 0.1 % due to the association between high dose prolonged exposure to respirable silica dust (with diameter lower than 10 µm) and silicosis and increased probability of developing lung cancer.<br>Data not needed, considering the formulation as a paste and the type of application. | - |

**Long-term toxicity and carcinogenicity (Regulation (EU) N°283/2013, Annex Part A, point 5.5)**

|                                                  |                                                                                                                                                                                                                                                                                                                                                                                  |   |
|--------------------------------------------------|----------------------------------------------------------------------------------------------------------------------------------------------------------------------------------------------------------------------------------------------------------------------------------------------------------------------------------------------------------------------------------|---|
| Long-term effects (target organ/critical effect) | No data submitted, not needed, considering the types of formulations and application.<br>Maximum content of particles with diameter below 10 µm in quartz sand should not exceed 0.1 % due to the association between high dose prolonged exposure to respirable silica dust (with diameter lower than 10 µm) and silicosis and increased probability of developing lung cancer. | - |
| Relevant long-term NOAEL                         | -                                                                                                                                                                                                                                                                                                                                                                                | - |
| Carcinogenicity (target organ, tumour type)      | Orally, negative in rats and mice (supplementary information – feeding studies with silica gel).<br>By inhalation, adenocarcinomas and squamous cell carcinomas in rats.                                                                                                                                                                                                         | - |
| Relevant NOAEL for carcinogenicity               | -                                                                                                                                                                                                                                                                                                                                                                                | - |

**Reproductive toxicity (Regulation (EU) N° 283/2013, Annex Part A, point 5.6)****Reproduction toxicity**

|                                       |                                                                                             |   |
|---------------------------------------|---------------------------------------------------------------------------------------------|---|
| Reproduction target / critical effect | Supplementary information of limited validity with amorphous silica, no further data needed | - |
| Relevant parental NOAEL               | -                                                                                           | - |
| Relevant reproductive NOAEL           | -                                                                                           | - |
| Relevant offspring NOAEL              | -                                                                                           | - |

**Developmental toxicity**

|                                        |                                                                        |   |
|----------------------------------------|------------------------------------------------------------------------|---|
| Developmental target / critical effect | None (supplementary information – studies with amorphous silica gels). | - |
| Relevant maternal NOAEL                | -                                                                      | - |
| Relevant developmental NOAEL           | -                                                                      | - |

**Neurotoxicity (Regulation (EU) N° 283/2013, Annex Part A, point 5.7)**

|                                                                              |                                |   |
|------------------------------------------------------------------------------|--------------------------------|---|
| Acute neurotoxicity                                                          | No data available, not needed. | - |
| Repeated neurotoxicity                                                       | No data available, not needed. | - |
| Additional studies (e.g. delayed neurotoxicity, developmental neurotoxicity) | No data available, not needed. | - |

**Other toxicological studies (Regulation (EU) N° 283/2013, Annex Part A, point 5.8)**

|                                                |                                                                                                                                                                                                                                                                                                                                                                 |  |
|------------------------------------------------|-----------------------------------------------------------------------------------------------------------------------------------------------------------------------------------------------------------------------------------------------------------------------------------------------------------------------------------------------------------------|--|
| Supplementary studies on the active substance  | No data available, not needed.                                                                                                                                                                                                                                                                                                                                  |  |
| Endocrine disrupting properties                | <p>In view of the intrinsic properties (insoluble and inert) of the active substance the assessment does not appear scientifically necessary.</p> <p>Quartz sand does not to meet the criteria for endocrine disruption for humans according to point 3.6.5 of Annex II to Regulation (EC) No 1107/2009, as amended by Commission Regulation (EU) 2018/605.</p> |  |
| Studies performed on metabolites or impurities | No data available, not needed.                                                                                                                                                                                                                                                                                                                                  |  |

**Medical data (Regulation (EU) N° 283/2013, Annex Part A, point 5.9)**

|                                                                                                                                                                                                                                                                                                                                                                                            |
|--------------------------------------------------------------------------------------------------------------------------------------------------------------------------------------------------------------------------------------------------------------------------------------------------------------------------------------------------------------------------------------------|
| <p>Adverse health effects (silicosis, chronic obstructive pulmonary disease, lung cancer, renal toxicity, increased risk of tuberculosis, and autoimmune diseases) from prolonged/ inhalation of high doses of crystalline silica particles &lt; 10 µm in occupational settings.</p> <p>Considering the types of formulations and applications, no data were submitted and are needed.</p> |
|--------------------------------------------------------------------------------------------------------------------------------------------------------------------------------------------------------------------------------------------------------------------------------------------------------------------------------------------------------------------------------------------|

**Summary<sup>2</sup> (Regulation (EU) N°1107/2009, Annex II, point 3.1 and 3.6)**

|                                           | Value<br>(mg/kg bw (per day))    | Study | Uncertainty factor |
|-------------------------------------------|----------------------------------|-------|--------------------|
| Acceptable Daily Intake (ADI)             | No data available, not required. | -     | -                  |
| Acute Reference Dose (ARfD)               | No data available, not required. | -     | -                  |
| Acceptable Operator Exposure Level (AOEL) | No data available, not required. | -     | -                  |

<sup>2</sup> If available include also reference values for metabolites



Acute Acceptable Operator Exposure Level (AAOEL)

|                                  |   |   |
|----------------------------------|---|---|
| No data available, not required. | - | - |
|----------------------------------|---|---|

\* Including correction for limited oral absorption/bioavailability (xx %).

### Dermal absorption (Regulation (EU) N° 284/2013, Annex Part A, point 7.3)

Representative formulation (*Repentol 6 PA*, *Wöbra*, *Cervacol Extra*, *Morsuvin*)

Dermal absorption is considered to be negligible due to the intrinsic properties (insoluble and inert) of the active substance.

### Exposure scenarios (Regulation (EU) N° 284/2013, Annex Part A, point 7.2)

Operators

Paintbrush and gloves application of quartz sand formulated as a paste was not considered to be a source of significant exposure.

Workers

Paintbrush and gloves application of quartz sand formulated as a paste was not considered to be a source of significant exposure.

Bystanders and residents

Paintbrush and gloves application of quartz sand formulated as a paste was not considered to be a source of significant exposure.

### Classification with regard to toxicological data (Regulation (EU) N° 283/2013, Annex Part A, Section 10)

Substance :

Quartz sand (0.1% maximum of particles diameter below 10 µm)

Harmonised classification according to Regulation (EC) No 1272/2008 and its Adaptations to Technical Process [Table 3.1 of Annex VI of Regulation (EC) No 1272/2008 as amended]<sup>3</sup> :

No current harmonized classification

According to the peer review proposal, criteria for harmonised classification according to Regulation (EC) No 1272/2008 may be met for:

No classification proposal for carcinogenic properties. For other endpoints: no data available to conclude, no further data needed.

<sup>3</sup> Regulation (EC) No 1272/2008 of the European Parliament and of the Council of 16 December 2008 on classification, labelling and packaging of substances and mixtures, amending and repealing Directives 67/548/EEC and 1999/45/EC, and amending Regulation (EC) No 1907/2006. OJ L 353, 31.12.2008, 1-1355.

## Residues in or on treated products food and feed

### Metabolism studies, methods of analysis and residue definitions in plants

Not required - Due to the inert and insoluble properties of its constituents, quartz sand is not expected to degrade or to form other metabolites relevant for the consumers when used in compliance with the representative uses.

The uses as coating/painting with brush of the individual trees of orchards are relevant for the consumer exposure assessment. It can reasonably be assumed that residues of quartz sand will not be quantified if the application to the orchards trees is conducted in a way that precludes any contamination of the edible parts of the fruits.

|                                                                                            |                |  |
|--------------------------------------------------------------------------------------------|----------------|--|
| Can a general residue definition be proposed for primary crops?                            | Not relevant   |  |
| Rotational crop and primary crop metabolism similar?                                       | Not applicable |  |
| Residue pattern in processed commodities similar to residue pattern in raw commodities?    | Not applicable |  |
| Plant residue definition for monitoring (RD-Mo)                                            | Not relevant   |  |
| Plant residue definition for risk assessment (RD-RA)                                       | Not relevant   |  |
| Methods of analysis for monitoring of residues (analytical technique, matrix groups, LOQs) | Not applicable |  |

**Stability of residues in plants**

Not required.

**Magnitude of residues in plants**

Not required.

**Residues in rotational crops****Overall summary**

Residues in rotational and succeeding crops expected based on confined rotational crop study?

Not triggered

Quartz sand is a game repellent and will be used as protection coat on the outer surface of deciduous and coniferous trees in forestry and fruit trees in orchards as well as ornamental shrubs and trees by coating manually with special brush or glove or by painting with brush the trunk of the individual trees.

Residues in rotational and succeeding crops expected based on field rotational crop study?

**Processing factors**

Not required.

**Residues in livestock**

## Nature of residues and methods of analysis in livestock

### Metabolism studies, methods of analysis and residue definitions in livestock

Not required.

|                                                                                            |                |               |
|--------------------------------------------------------------------------------------------|----------------|---------------|
| Time needed to reach a plateau concentration in milk and eggs (days)                       | Milk:          | not triggered |
|                                                                                            | Eggs:          | not triggered |
| Metabolism in rat and ruminant similar                                                     | not triggered  |               |
| Can a general residue definition be proposed for animals?                                  | Not relevant   |               |
| Animal residue definition for monitoring (RD-Mo)                                           | Not relevant   |               |
| Animal residue definition for risk assessment (RD-RA)                                      | Not relevant   |               |
| Fat soluble residues                                                                       | Yes/No         | Not relevant. |
| Methods of analysis for monitoring of residues (analytical technique, matrix groups, LOQs) | Not applicable |               |

### Stability of residues in livestock

Not required.

### Magnitude of residues in livestock

Not required.

### Consumer risk assessment

Since data on genotoxicity and general toxicity of this substance were not submitted, the toxicological profile of quartz sand could not be assessed and toxicological reference values (ADI, ARfD) were not derived (see section 2).

However, a negligible exposure for the consumers to residues of quartz sand is expected when the representative uses are considered, and a consumer dietary risk assessment can be waived.

Consumer exposure assessment through drinking water resulting from groundwater metabolite(s) according to SANCO/221/2000 rev.10 Final (25/02/2003)

Not relevant

### **Recommended MRLs**

Quartz sand has been notified as a game repellent for the uses on deciduous and coniferous trees in forestry, fruit trees in orchards as well as on ornamental shrubs and trees by coating manually with special brush or glove or by painting with brush the trunk of the individual trees.

Based on these representative uses, a negligible exposure for the consumers to residues of quartz sand is expected and a consumer dietary risk assessment can be waived. No MRLs are therefore proposed for the representative uses.

However, not all the five assessment criteria according to the Commission guidance SANCO/11188/2013 Rev. 2 (European Commission, 2015) for potential inclusion in Annex IV of Regulation (EC) No 396/2005, were met for quartz sand. Three criteria are considered to be met (III, IV and V) for quartz sand.

The review of existing maximum residue levels (MRLs) under Article 12 of Regulation (EC) No 396/2005 is covered by the assessment of the representative uses on orchards and on deciduous and coniferous trees in forestry since the most critical authorised uses from European Member States consist in a single treatment by coating manually the trunks of the trees with special brush or gloves, at a dose rate covered by the maximum dose rate of application intended in the representative uses.

**Environmental fate and behaviour****Route of degradation (aerobic) in soil (Regulation (EU) N° 283/2013, Annex Part A, point 7.1.1.1)**

|                                                                                                  |                |
|--------------------------------------------------------------------------------------------------|----------------|
| Mineralisation after 100 days                                                                    | Not relevant   |
| Non-extractable residues after 100 days                                                          | Not relevant   |
| Metabolites requiring further consideration - name and/or code, % of applied (range and maximum) | No metabolites |

**Route of degradation (anaerobic) in soil (Regulation (EU) N° 283/2013, Annex Part A, point 7.1.1.2)**

|                                                                                                                             |                |
|-----------------------------------------------------------------------------------------------------------------------------|----------------|
| Mineralisation after 100 days                                                                                               | Not relevant   |
| Non-extractable residues after 100 days                                                                                     | Not relevant   |
| Metabolites that may require further consideration for risk assessment - name and/or code, % of applied (range and maximum) | No metabolites |

**Route of degradation (photolysis) on soil (Regulation (EU) N° 283/2013, Annex Part A, point 7.1.1.3)**

|                                                                                                                             |                |
|-----------------------------------------------------------------------------------------------------------------------------|----------------|
| Metabolites that may require further consideration for risk assessment - name and/or code, % of applied (range and maximum) | No metabolites |
| Mineralisation at study end                                                                                                 | Not relevant   |
| Non-extractable residues at study end                                                                                       | Not relevant   |

**Rate of degradation in soil (aerobic) laboratory studies active substance (Regulation (EU) N° 283/2013, Annex Part A, point 7.1.2.1.1 and Regulation (EU) N° 284/2013, Annex Part A, point 9.1.1.1)**

| Parent                               | Dark aerobic conditions |    |                |                                        |                                      |                       |                       |
|--------------------------------------|-------------------------|----|----------------|----------------------------------------|--------------------------------------|-----------------------|-----------------------|
|                                      | Soil type               | pH | t. °C / % MWHC | DT <sub>50</sub> /DT <sub>90</sub> (d) | DT <sub>50</sub> (d) 20 °C pF2/10kPa | St. (χ <sup>2</sup> ) | Method of calculation |
| -                                    | -                       | -  | -              | -                                      | -                                    | -                     | -                     |
| Geometric mean (if not pH dependent) |                         |    |                |                                        | -                                    |                       |                       |

|               |   |
|---------------|---|
| pH dependence | - |
|---------------|---|

**Rate of degradation in soil (aerobic) laboratory studies transformation products (Regulation (EU) N° 283/2013, Annex Part A, point 7.1.2.1.2 and Regulation (EU) N° 284/2013, Annex Part A, point 9.1.1.1)**

| Met 1                                | Dark aerobic conditions |                   |                                            |                                              |                                            |                     |                          |
|--------------------------------------|-------------------------|-------------------|--------------------------------------------|----------------------------------------------|--------------------------------------------|---------------------|--------------------------|
| Soil type                            | pH                      | t. °C / %<br>MWHC | DT <sub>50</sub> / DT <sub>90</sub><br>(d) | f. f.<br>k <sub>f</sub> /<br>k <sub>dp</sub> | DT <sub>50</sub> (d)<br>20 °C<br>pF2/10kPa | St.<br>( $\chi^2$ ) | Method of<br>calculation |
| -                                    | -                       | -                 | -                                          | -                                            | -                                          | -                   | -                        |
| Geometric mean (if not pH dependent) |                         |                   |                                            |                                              | -                                          |                     |                          |
| Arithmetic mean                      |                         |                   |                                            | -                                            |                                            |                     |                          |
| pH dependence                        |                         |                   |                                            |                                              | -                                          |                     |                          |

**Soil accumulation (Regulation (EU) N° 283/2013, Annex Part A, point 7.1.2.2.2 and Regulation (EU) N° 284/2013, Annex Part A, point 9.1.1.2.2)**

Soil accumulation and plateau concentration

Natural background levels of silica in water and soil are a lot higher than the use as a plant protection product might ever cause.

**Rate of degradation in soil (anaerobic) laboratory studies active substance (Regulation (EU) N° 283/2013, Annex Part A, point 7.1.2.1.3 and Regulation (EU) N° 284/2013, Annex Part A, point 9.1.1.1)**

| Parent                               | Dark anaerobic conditions |                   |                                            |                               |                     |                          |
|--------------------------------------|---------------------------|-------------------|--------------------------------------------|-------------------------------|---------------------|--------------------------|
| Soil type                            | pH                        | t. °C / %<br>MWHC | DT <sub>50</sub> / DT <sub>90</sub><br>(d) | DT <sub>50</sub> (d)<br>20 °C | St.<br>( $\chi^2$ ) | Method of<br>calculation |
| -                                    | -                         | -                 | -                                          | -                             | -                   |                          |
| Geometric mean (if not pH dependent) |                           |                   |                                            | -                             |                     |                          |

**Rate of degradation in soil (anaerobic) laboratory studies transformation products (Regulation (EU) N° 283/2013, Annex Part A, point 7.1.2.1.4 and Regulation (EU) N° 284/2013, Annex Part A, point 9.1.1.1)**

| Met 1                                | Dark anaerobic conditions |                   |                                            |                                           |                              |                     |                          |
|--------------------------------------|---------------------------|-------------------|--------------------------------------------|-------------------------------------------|------------------------------|---------------------|--------------------------|
| Soil type                            | pH                        | t. °C / %<br>MWHC | DT <sub>50</sub> / DT <sub>90</sub><br>(d) | f. f.<br>k <sub>f</sub> / k <sub>dp</sub> | DT <sub>50</sub> (d)<br>20°C | St.<br>( $\chi^2$ ) | Method of<br>calculation |
| -                                    | -                         | -                 | -                                          | -                                         | -                            | -                   | -                        |
| Geometric mean (if not pH dependent) |                           |                   |                                            |                                           | -                            |                     |                          |
| Arithmetic mean                      |                           |                   |                                            | -                                         |                              |                     |                          |

**Rate of degradation on soil (photolysis) laboratory active substance (Regulation (EU) N° 283/2013, Annex Part A, point 7.1.1.3)**

| Parent    | Soil photolysis |                |                                         |                  |                       |
|-----------|-----------------|----------------|-----------------------------------------|------------------|-----------------------|
| Soil type | pH              | t. °C / % MWHC | DT <sub>50</sub> / DT <sub>90</sub> (d) | St. ( $\chi^2$ ) | Method of calculation |
| -         | -               | -              | -                                       | -                | -                     |

**Soil adsorption active substance (Regulation (EU) N° 283/2013, Annex Part A, point 7.1.3.1.1 and Regulation (EU) N° 284/2013, Annex Part A, point 9.1.2.1)**

| Parent                                |      |         |                       |                         |                       |                         |     |   |
|---------------------------------------|------|---------|-----------------------|-------------------------|-----------------------|-------------------------|-----|---|
| Soil Type                             | OC % | Soil pH | K <sub>d</sub> (mL/g) | K <sub>doc</sub> (mL/g) | K <sub>F</sub> (mL/g) | K <sub>Foc</sub> (mL/g) | 1/n |   |
| -                                     | -    | -       | -                     | -                       | -                     | -                       | -   | - |
| Geometric mean (if not pH dependent)* |      |         |                       |                         |                       | -                       | -   |   |
| Arithmetic mean (if not pH dependent) |      |         |                       |                         |                       |                         |     | - |
| pH dependence                         |      |         | -                     |                         |                       |                         |     |   |

\* Only relevant after implementation of the published EFSA guidance.

**Soil adsorption transformation products (Regulation (EU) N° 283/2013, Annex Part A, point 7.1.3.1.2 and Regulation (EU) N° 284/2013, Annex Part A, point 9.1.2.1)**

| Met 1                                 |      |         |                       |                         |                       |                         |     |   |
|---------------------------------------|------|---------|-----------------------|-------------------------|-----------------------|-------------------------|-----|---|
| Soil Type                             | OC % | Soil pH | K <sub>d</sub> (mL/g) | K <sub>doc</sub> (mL/g) | K <sub>F</sub> (mL/g) | K <sub>Foc</sub> (mL/g) | 1/n |   |
| -                                     | -    | -       | -                     | -                       | -                     | -                       | -   | - |
| Geometric mean (if not pH dependent)* |      |         |                       |                         |                       | -                       | -   |   |
| Arithmetic mean (if not pH dependent) |      |         |                       |                         |                       |                         |     | - |
| pH dependence                         |      |         | -                     |                         |                       |                         |     |   |

\* Only relevant after implementation of the published EFSA guidance.

**Mobility in soil column leaching active substance (Regulation (EU) N° 283/2013, Annex Part A, point 7.1.4.1.1 and Regulation (EU) N° 284/2013, Annex Part A, point 9.1.2.1)**

Column leaching

Not relevant

**Lysimeter / field leaching studies (Regulation (EU) N° 283/2013, Annex Part A, points 7.1.4.2 / 7.1.4.3 and Regulation (EU) N° 284/2013, Annex Part A, points 9.1.2.2 / 9.1.2.3)**

Lysimeter/ field leaching studies

Not relevant



**Hydrolytic degradation (Regulation (EU) N° 283/2013, Annex Part A, point 7.2.1.1)**

Hydrolytic degradation of the active substance and metabolites &gt; 10 %

Quartz is stable in water.

**Aqueous photochemical degradation (Regulation (EU) N° 283/2013, Annex Part A, points 7.2.1.2 / 7.2.1.3)**

Photolytic degradation of active substance and metabolites above 10 %

Quartz is stable in water.

Quantum yield of direct phototransformation in water at  $\Sigma > 290$  nm

Not relevant

**'Ready biodegradability' (Regulation (EU) N° 283/2013, Annex Part A, point 7.2.2.1)**

Readily biodegradable (yes/no)

No data submitted, substance considered not readily biodegradable

**Aerobic mineralisation in surface water (Regulation (EU) N° 283/2013, Annex Part A, point 7.2.2.2 and Regulation (EU) N° 284/2013, Annex Part A, point 9.2.1)**

| Parent                                                           |                      |           |          |                                               |                |                     |                                          |                  |                     |                          |
|------------------------------------------------------------------|----------------------|-----------|----------|-----------------------------------------------|----------------|---------------------|------------------------------------------|------------------|---------------------|--------------------------|
| System identifier<br>(indicate fresh,<br>estuarine or<br>marine) | pH<br>water<br>phase | pH<br>sed | t.<br>°C | DT <sub>50</sub> /DT <sub>90</sub> whole sys. |                | St.<br>( $\chi^2$ ) | DT <sub>50</sub> /DT <sub>90</sub> Water |                  | St.<br>( $\chi^2$ ) | Method of<br>calculation |
|                                                                  |                      |           |          | At study<br>temp                              | Norm.<br>to °C |                     | At study<br>temp                         | Norm.<br>to x °C |                     |                          |
| -                                                                | -                    | -         | -        | -                                             | -              | -                   | -                                        | -                | -                   | -                        |

| Met 1                                                            |                      |           |          |                                               |                  |                     |                                             |                  |                     |                          |
|------------------------------------------------------------------|----------------------|-----------|----------|-----------------------------------------------|------------------|---------------------|---------------------------------------------|------------------|---------------------|--------------------------|
| Max in total system x % after n days                             |                      |           |          |                                               |                  |                     |                                             |                  |                     |                          |
| System identifier<br>(indicate fresh,<br>estuarine or<br>marine) | pH<br>water<br>phase | pH<br>sed | t.<br>°C | DT <sub>50</sub> /DT <sub>90</sub> whole sys. |                  | St.<br>( $\chi^2$ ) | DT <sub>50</sub> /DT <sub>90</sub><br>Water |                  | St.<br>( $\chi^2$ ) | Method of<br>calculation |
|                                                                  |                      |           |          | At study<br>temp                              | Norm.<br>to x °C |                     | At study<br>temp                            | Norm.<br>to x °C |                     |                          |
| -                                                                | -                    | -         | -        | -                                             | -                | -                   | -                                           | -                | -                   | -                        |

| Mineralisation and non-extractable residues (for parent dosed experiments) |                      |           |                                  |                                                    |                                                   |
|----------------------------------------------------------------------------|----------------------|-----------|----------------------------------|----------------------------------------------------|---------------------------------------------------|
| System identifier<br>(indicate fresh,<br>estuarine or<br>marine)           | pH<br>water<br>phase | pH<br>sed | Mineralisation<br>x % after n d. | Non-extractable<br>residues. max x %<br>after n d. | Non-extractable<br>residues. max x %<br>after n d |
| -                                                                          | -                    | -         | -                                | -                                                  | -                                                 |

**Water / sediment study (Regulation (EU) N° 283/2013, Annex Part A, point 7.2.2.3 and Regulation (EU) N° 284/2013, Annex Part A, point 9.2.2)**

| Parent                  | Distribution <i>max in water x after n d. max. sed x % after n d</i> |        |       |                                               |                  |                                          |                  |                                        |                  |                       |
|-------------------------|----------------------------------------------------------------------|--------|-------|-----------------------------------------------|------------------|------------------------------------------|------------------|----------------------------------------|------------------|-----------------------|
| Water / sediment system | pH water phase                                                       | pH sed | t. °C | DT <sub>50</sub> /DT <sub>90</sub> whole sys. | St. ( $\chi^2$ ) | DT <sub>50</sub> /DT <sub>90</sub> water | St. ( $\chi^2$ ) | DT <sub>50</sub> /DT <sub>90</sub> sed | St. ( $\chi^2$ ) | Method of calculation |
| -                       | -                                                                    | -      | -     | -                                             | -                | -                                        | -                | -                                      | -                | -                     |
| Geometric mean at 20°C  |                                                                      |        |       | -                                             |                  | -                                        |                  | -                                      |                  | -                     |

| Met 1                   | Distribution <i>max in water x after n d. max. sed x % after n d. max in total system x % after n days,</i><br>kinetic formation fraction ( $k_f/k_{dp}$ ): - |        |       |                                               |                  |                                          |                  |                                        |                  |                       |
|-------------------------|---------------------------------------------------------------------------------------------------------------------------------------------------------------|--------|-------|-----------------------------------------------|------------------|------------------------------------------|------------------|----------------------------------------|------------------|-----------------------|
| Water / sediment system | pH water phase                                                                                                                                                | pH sed | t. °C | DT <sub>50</sub> /DT <sub>90</sub> whole sys. | St. ( $\chi^2$ ) | DT <sub>50</sub> /DT <sub>90</sub> water | St. ( $\chi^2$ ) | DT <sub>50</sub> /DT <sub>90</sub> sed | St. ( $\chi^2$ ) | Method of calculation |
| -                       | -                                                                                                                                                             | -      | -     | -                                             | -                | -                                        | -                | -                                      | -                | -                     |
| Geometric mean at 20°C  |                                                                                                                                                               |        |       | -                                             |                  | -                                        |                  | -                                      |                  | -                     |

| Mineralisation and non extractable residues (from parent dosed experiments) |                |        |                                                   |                                                    |                                                                       |
|-----------------------------------------------------------------------------|----------------|--------|---------------------------------------------------|----------------------------------------------------|-----------------------------------------------------------------------|
| Water / sediment system                                                     | pH water phase | pH sed | Mineralisation x % after n d. (end of the study). | Non-extractable residues in sed. max x % after n d | Non-extractable residues in sed. max x % after n d (end of the study) |
| -                                                                           | -              | -      | -                                                 | -                                                  | -                                                                     |

**Fate and behaviour in air (Regulation (EU) N° 283/2013, Annex Part A, point 7.3.1)**

|                                            |                                   |
|--------------------------------------------|-----------------------------------|
| Direct photolysis in air                   | Not relevant                      |
| Photochemical oxidative degradation in air | Not relevant                      |
| Volatilisation                             | Quartz is not a volatile compound |
| Metabolites                                | No metabolites                    |

**Residues requiring further assessment (Regulation (EU) N° 283/2013, Annex Part A, point 7.4.1)**

Environmental occurring residues requiring further assessment by other disciplines (toxicology and ecotoxicology) and or requiring consideration for groundwater exposure

Natural background levels of silica in water and soil are a lot higher than the uses as a plant protection product might ever cause. SiO<sub>2</sub> is chemically inert and does not form any metabolites of environmental concern.

**Definition of the residue for monitoring (Regulation (EU) N° 283/2013, Annex Part A, point 7.4.2)**

No residue definitions are proposed for all environmental compartments. SiO<sub>2</sub> is naturally occurring in the environment.

**Monitoring data, if available (Regulation (EU) N° 283/2013, Annex Part A, point 7.5)**

|                                                     |              |
|-----------------------------------------------------|--------------|
| Soil (indicate location and type of study)          | Not relevant |
| Surface water (indicate location and type of study) | Not relevant |
| Ground water (indicate location and type of study)  | Not relevant |
| Air (indicate location and type of study)           | Not relevant |

**PEC soil (Regulation (EU) N° 284/2013, Annex Part A, points 9.1.3 / 9.3.1)**

Parent Not calculated, not relevant

Met 1 Not calculated, not relevant

**PEC ground water (Regulation (EU) N° 284/2013, Annex Part A, point 9.2.4.1)**

Method of calculation and type of study (*e.g.* modelling, field leaching, lysimeter) Not calculated, not relevant

**PEC surface water and PEC sediment (Regulation (EU) N° 284/2013, Annex Part A, points 9.2.5 / 9.3.1)**

Parent Not calculated, not relevant

Met 1 Not calculated, not relevant

**Estimation of concentrations from other routes of exposure (Regulation (EU) N° 284/2013, Annex Part A, point 9.4)**

Method of calculation Not relevant

## Ecotoxicology

### Effects on birds and other terrestrial vertebrates (Regulation (EU) N° 283/2013, Annex Part A, point 8.1 and Regulation (EU) N° 284/2013, Annex Part A, point 10.1)

| Species                                                                                                                                                                                                                                                                                                                                                                                                                                                              | Test substance                               | Time scale | End point        | Toxicity |
|----------------------------------------------------------------------------------------------------------------------------------------------------------------------------------------------------------------------------------------------------------------------------------------------------------------------------------------------------------------------------------------------------------------------------------------------------------------------|----------------------------------------------|------------|------------------|----------|
| <b>Birds</b>                                                                                                                                                                                                                                                                                                                                                                                                                                                         |                                              |            |                  |          |
|                                                                                                                                                                                                                                                                                                                                                                                                                                                                      | Quartz sand (a.s.)                           | Acute      | LD <sub>50</sub> | No data. |
|                                                                                                                                                                                                                                                                                                                                                                                                                                                                      | Preparations                                 | Acute      | LD <sub>50</sub> | No data. |
|                                                                                                                                                                                                                                                                                                                                                                                                                                                                      | Quartz sand (a.s.)                           | Long-term  | NOAEL            | No data. |
| <b>Mammals</b>                                                                                                                                                                                                                                                                                                                                                                                                                                                       |                                              |            |                  |          |
| <i>Rat</i>                                                                                                                                                                                                                                                                                                                                                                                                                                                           | Amorphous silica (supplementary information) | Acute      | LD <sub>50</sub> | >2000    |
|                                                                                                                                                                                                                                                                                                                                                                                                                                                                      | Preparations                                 | Acute      | LD <sub>50</sub> | No data. |
| <i>Rat</i>                                                                                                                                                                                                                                                                                                                                                                                                                                                           | Quartz sand (a.s.)                           | Long-term  | NOAEL            | No data. |
| <p>Endocrine disrupting properties (Annex Part A, points 8.1.5)</p> <p>In view of the phys-chem properties (insoluble and inert) and the (eco) toxicological profile of the active substance the assessment does not appear scientifically necessary.</p> <p>Quartz sand does not meet the criteria for endocrine disruption for humans according to point 3.6.5 of Annex II to Regulation (EC) No 1107/2009, as amended by Commission Regulation (EU) 2018/605.</p> |                                              |            |                  |          |
| <p>Additional higher tier studies (Annex Part A, points 10.1.1.2):</p> <p>Not required</p>                                                                                                                                                                                                                                                                                                                                                                           |                                              |            |                  |          |
| <p>Terrestrial vertebrate wildlife (birds, mammals, reptile and amphibians) (Annex Part A, points 8.1.4, 10.1.3):</p> <p>No data, not required.</p>                                                                                                                                                                                                                                                                                                                  |                                              |            |                  |          |

### Toxicity/exposure ratios for terrestrial vertebrates (Regulation (EU) N° 284/2013, Part A, Annex point 10.1)

#### All proposed uses of Quartz sand in forestry

No toxicity from the active substance quartz sand and the formulated products is expected for birds and other terrestrial vertebrates. Quartz sand is a ubiquitous mineral of the earth's crust thus birds and other terrestrial vertebrates are continuously exposed to quartz sand in environment. Quartz sand is used as a coating of trees (manually applied) to prevent game from bark stripping. The risk for birds and terrestrial vertebrates after application of quartz sand is considered low. The calculation of toxicity/exposure ratios is therefore not considered necessary.

### Toxicity data for all aquatic tested species (Regulation (EU) N° 283/2013, Annex Part A, points 8.2 and Regulation (EU) N° 284/2013 Annex Part A, point 10.2)\*

\* This section does not yet reflect the new EFSA Guidance Document on aquatic organisms which has been noted in the meeting of the Standing Committee on Plants, Animals, Food and Feed on 11 July 2014.

| Group                                           | Test substance                     | Time - scale<br>(Test type)                                   | End point                                                              | Toxicity <sup>1</sup>     |
|-------------------------------------------------|------------------------------------|---------------------------------------------------------------|------------------------------------------------------------------------|---------------------------|
| Laboratory tests                                |                                    |                                                               |                                                                        |                           |
| Fish                                            |                                    |                                                               |                                                                        |                           |
|                                                 | Quartz sand<br>(a.s.)              | Acute 96 hr<br>(static, or<br>semi-static or<br>flow-through) | Mortality, LC <sub>50</sub>                                            | No data.                  |
| Rainbow trout<br><i>Oncorhynchus<br/>mykiss</i> | Preparation<br>Cervacol Extra      | Acute 96 hr,<br>(static)                                      | Mortality, LC <sub>50</sub>                                            | >500 mg /L <sub>nom</sub> |
| Rainbow trout<br><i>Oncorhynchus<br/>mykiss</i> | Preparation<br>Wöbra**             | Acute 96 hr,<br>(static)                                      | Mortality, LC <sub>50</sub>                                            | >100 mg/L <sub>nom</sub>  |
| Guppy<br><i>Poecilla reticulata</i>             | Preparation<br>Morsuvin**          | Acute 96 hr,<br>(static)*                                     | Mortality, LC <sub>50</sub>                                            | >36.9 mg/L <sub>nom</sub> |
| Brook trout<br><i>Salvelinus fontinatis</i>     | Preparation<br>Repentol 6<br>PA**  | Acute 96 hr,<br>(static)                                      | Mortality, LC <sub>50</sub>                                            | >100 mg/L <sub>nom</sub>  |
| Carp<br><i>Cyprinus carpio</i>                  | Preparation<br>Repentol 6<br>PA**  | Acute 96 hr,<br>(static)                                      | Mortality, LC <sub>50</sub>                                            | >100 mg/L <sub>nom</sub>  |
|                                                 | Quartz sand<br>(a.s.)              | Chronic (static,<br>or semi-static<br>or flow-<br>through)    | Growth, or<br>development, or<br>behaviour, or<br>reproduction<br>NOEC | No data.                  |
| Aquatic invertebrates                           |                                    |                                                               |                                                                        |                           |
|                                                 | Quartz sand<br>(a.s.)              | Acute 48 hr<br>(static, or<br>semi-static or<br>flow-through) | Mortality, EC <sub>50</sub>                                            | No data.                  |
| <i>Daphnia magna</i>                            | Preparation<br>Cervacol<br>Extra** | Acute 48 hr,<br>static                                        | Mortality, EC <sub>50</sub>                                            | >500 mg/L <sub>nom</sub>  |
| <i>Daphnia magna</i>                            | Preparation<br>Wöbra**             | Acute 48 hr,<br>static                                        | Mortality, EC <sub>50</sub>                                            | >1000 mg/L <sub>nom</sub> |
| <i>Daphnia magna</i>                            | Preparation<br>Morsuvin**          | Acute 48 hr,<br>static*                                       | Mortality, EC <sub>50</sub>                                            | 92.06 mg/L <sub>nom</sub> |
| <i>Daphnia magna</i>                            | Preparation<br>Repentol 6<br>PA**  | Acute 48 hr,<br>static                                        | Mortality, EC <sub>50</sub>                                            | 370 mg/L <sub>nom</sub>   |

| Group                                                                                                                                                                                                                                                                                                                                                                                                                                                            | Test substance                     | Time - scale<br>(Test type)                                    | End point                                                                  | Toxicity <sup>1</sup>                                                                                                                        |
|------------------------------------------------------------------------------------------------------------------------------------------------------------------------------------------------------------------------------------------------------------------------------------------------------------------------------------------------------------------------------------------------------------------------------------------------------------------|------------------------------------|----------------------------------------------------------------|----------------------------------------------------------------------------|----------------------------------------------------------------------------------------------------------------------------------------------|
|                                                                                                                                                                                                                                                                                                                                                                                                                                                                  | Quartz sand<br>(a.s.)              | Chronic 21 d<br>(static, or<br>semi-static or<br>flow-through) | Reproduction or<br>development,<br>NOEC                                    | No data.                                                                                                                                     |
| Sediment-dwelling organisms                                                                                                                                                                                                                                                                                                                                                                                                                                      |                                    |                                                                |                                                                            |                                                                                                                                              |
|                                                                                                                                                                                                                                                                                                                                                                                                                                                                  | Quartz sand<br>(a.s.)              | 28 d (static, or<br>semi-static or<br>flow-through)            | NOEC                                                                       | No data.                                                                                                                                     |
| Algae                                                                                                                                                                                                                                                                                                                                                                                                                                                            |                                    |                                                                |                                                                            |                                                                                                                                              |
|                                                                                                                                                                                                                                                                                                                                                                                                                                                                  | Quartz sand<br>(a.s.)              | 72 hr (static, or<br>semi-static or<br>flow-through)           | Growth rate: $E_rC_{50}$<br>Biomass: $E_bC_{50}$<br>Yield: $E_yC_{50}$     | No data.                                                                                                                                     |
| Green alga<br><i>Pseudokirchneriella<br/>subcapitata</i>                                                                                                                                                                                                                                                                                                                                                                                                         | Preparation<br>Cervacol<br>Extra** | 72 h, static                                                   | Growth rate: $E_rC_{50}$<br><br>Biomass: $E_bC_{50}$<br>Yield: $E_yC_{50}$ | $E_rC_{50} = >500 \text{ mg/L}_{\text{nom}}$<br>$E_bC_{50} = >500 \text{ mg/L}_{\text{nom}}$<br>$E_yC_{50} = >500 \text{ mg/L}_{\text{nom}}$ |
| Green alga<br><i>Scenedesmus<br/>subspicatus</i>                                                                                                                                                                                                                                                                                                                                                                                                                 | Preparation<br>Wöbra**             | 72 h, static                                                   | Growth rate: $E_rC_{50}$<br><br>Biomass: $E_bC_{50}$                       | $E_rC_{50} = >1000 \text{ mg/L}_{\text{nom}}$<br><br>$E_bC_{50} = >1000 \text{ mg/L}_{\text{nom}}$                                           |
| Green alga<br><i>Scenedesmus<br/>subspicatus</i>                                                                                                                                                                                                                                                                                                                                                                                                                 | Preparation<br>Morsuvin**          | 72 h, static*                                                  | Biomass: $E_bC_{50}$                                                       | $E_bC_{50} = 13.9 \text{ mg/L}_{\text{nom}}$                                                                                                 |
| Green alga<br><i>Scenedesmus<br/>subspicatus</i>                                                                                                                                                                                                                                                                                                                                                                                                                 | Preparation<br>Repentol 6<br>PA**  | 72 h, static                                                   | Growth: $IC_{50}$                                                          | $E_rC_{50} = >100 \text{ mg/L}_{\text{nom}}$                                                                                                 |
| Higher plant                                                                                                                                                                                                                                                                                                                                                                                                                                                     |                                    |                                                                |                                                                            |                                                                                                                                              |
| No endpoints available, not required                                                                                                                                                                                                                                                                                                                                                                                                                             |                                    |                                                                |                                                                            |                                                                                                                                              |
| Further testing on aquatic organisms<br>No additional testing was required.                                                                                                                                                                                                                                                                                                                                                                                      |                                    |                                                                |                                                                            |                                                                                                                                              |
| Potential endocrine disrupting properties (Annex Part A, point 8.2.3)<br>In view of the phys-chem properties (insoluble and inert) and the (eco)toxicological profile of the active substance the assessment does not appear scientifically necessary.<br>Quartz sand does not to meet the criteria for endocrine disruption for humans according to point 3.6.5 of Annex II to Regulation (EC) No 1107/2009, as amended by Commission Regulation (EU) 2018/605. |                                    |                                                                |                                                                            |                                                                                                                                              |

<sup>1</sup> (<sub>nom</sub>) nominal concentration; a.s.: active substance

\*Test conditions were not reported, but assumed to be static

\*\*The studies are not fully reliable

**Bioconcentration in fish (Annex Part A, point 8.2.2.3)**

|                                                                                                | Active substance                                                                                                                                                                                                                                                                                           | No relevant metabolites |
|------------------------------------------------------------------------------------------------|------------------------------------------------------------------------------------------------------------------------------------------------------------------------------------------------------------------------------------------------------------------------------------------------------------|-------------------------|
| logP <sub>O/w</sub>                                                                            | No studies on bioconcentration in fish were submitted for Annex I inclusion of quartz sand and no studies are considered necessary for re-evaluation. Quartz sand ubiquitously occurs in the environment. It is chemically inert and insoluble in water/lipids, thus has no potential for bioaccumulation. |                         |
| Steady - state bioconcentration factor (BCF) (total wet weight/normalised to 5% lipid content) |                                                                                                                                                                                                                                                                                                            |                         |
| Uptake/depuration kinetics BCF (total wet weight/normalised to 5% lipid content)               |                                                                                                                                                                                                                                                                                                            |                         |
| Annex VI Trigger for the bioconcentration factor                                               |                                                                                                                                                                                                                                                                                                            |                         |
| Clearance time (days) (CT <sub>50</sub> )                                                      |                                                                                                                                                                                                                                                                                                            |                         |
| (CT <sub>90</sub> )                                                                            |                                                                                                                                                                                                                                                                                                            |                         |
| Level and nature of residues (%) in organisms after the 14-day depuration phase                |                                                                                                                                                                                                                                                                                                            |                         |
| Higher tier study                                                                              |                                                                                                                                                                                                                                                                                                            |                         |
| No data.                                                                                       |                                                                                                                                                                                                                                                                                                            |                         |

**Toxicity/exposure ratios for the most sensitive aquatic organisms (Regulation (EU) N° 284/2013, Annex Part A, point 10.2)****All proposed uses of Quartz sand in forestry**

Quartz sand is commonly found in all environmental compartments (water, soil, sediment, plants and algae) and is not soluble in water. Due to its properties (chemically inert, non-soluble) it can be considered as not bioavailable for aquatic organisms and will be indistinguishable from natural occurring sand particles.

Representative formulations are prepared in a form of a paste and will be manually applied onto tree trunks, so no direct contamination of water is expected and aquatic organisms will not be directly affected. Furthermore, most formulations have been demonstrated not to be toxic to the standard test species of fish, aquatic invertebrates and algae. Due to the assumed lack of exposure and due to the low toxicity of the formulations, the acute risk for aquatic organisms after use of repellents containing quartz sand is considered low. Calculation of Predicted Environmental Concentrations in surface waters (PEC<sub>sw</sub>) for quartz sand is not considered relevant. The derivation of acute and long-term toxicity regulatory acceptable concentrations (RAC) and comparison with PEC<sub>sw</sub> is therefore not considered necessary.



**Effects on bees (Regulation (EU) N° 283/2013, Annex Part A, point 8.3.1 and Regulation (EU) N° 284/2013 Annex Part A, point 10.3.1)\***

\* This section does reflect the new EFSA Guidance Document on bees which has not yet been noted by the Standing Committee on Plants, Animals, Food and Feed.

| Species   | Test substance                      | Time scale/type of endpoint                       | End point                   | Toxicity               |
|-----------|-------------------------------------|---------------------------------------------------|-----------------------------|------------------------|
| Honeybees | Preparation Morsuvin                | Acute (24h)                                       | Oral (LD <sub>50</sub> )    | >20 mg/bee             |
| Honeybees | Preparation Morsuvin                | Acute (24h)                                       | Contact (LD <sub>50</sub> ) | >2000 µg/bee           |
|           | Quartz sand (a.s.)/<br>Preparations | Chronic                                           | 10 d-LC50                   | No data, not required. |
|           | Quartz sand (a.s.)/<br>Preparations | Bee brood development                             | NOEClarvae                  | No data, not required. |
|           | Quartz sand (a.s.)/<br>Preparations | Sub-lethal effects (behavioural and reproductive) | NOEC hypopharyngeal glands  | No data, not required. |

|                                                    |
|----------------------------------------------------|
| Potential for accumulative toxicity: No data.      |
| Semi-field test (Cage and tunnel test)<br>No data. |
| Field tests<br>No data.                            |

**Risk assessment** for all proposed uses of Quartz sand

Quartz sand is a natural ubiquitously occurring substance intended for a manual application onto trees, hence the exposure of bees is considered negligible and thus risk is considered as low. The calculation of Hazard Quotients (HQ) and Exposure/Toxicity Ratios (ETR) are therefore not considered necessary.

**Effects on other arthropod species (Regulation (EU) N° 283/2013, Annex Part A, point 8.3.2 and Regulation (EU) N° 284/2013 Annex Part A, point 10.3.2)**
**Laboratory tests with standard sensitive species**

| Species                      | Test Substance                      | End point                                                     | Toxicity               |
|------------------------------|-------------------------------------|---------------------------------------------------------------|------------------------|
| <i>Typhlodromus pyri</i>     | Quartz sand (a.s.)/<br>Preparations | Mortality, LR <sub>50</sub><br>Reproduction, ER <sub>50</sub> | No data, not required. |
| <i>Aphidius rhopalosiphi</i> | Quartz sand (a.s.)/<br>Preparations | Mortality, LR <sub>50</sub><br>Reproduction, ER <sub>50</sub> | No data, not required. |
| Additional species           |                                     |                                                               |                        |
| No data.                     |                                     |                                                               |                        |

**Extended laboratory tests, aged residue tests**

|          |
|----------|
| No data. |
|----------|

**Risk assessment for all proposed uses of Quartz sand**

|                                                                                                                                                                                                                                                                                                                                                        |
|--------------------------------------------------------------------------------------------------------------------------------------------------------------------------------------------------------------------------------------------------------------------------------------------------------------------------------------------------------|
| Due to the facts that the quartz sand is used as a coating onto trees, which is a no large-area application and quartz sand ubiquitously occurs in the environment, exposure to non-target arthropods is considered negligible and thus the risk is considered as low. The calculation of Hazard Quotients (HQ) is therefore not considered necessary. |
|--------------------------------------------------------------------------------------------------------------------------------------------------------------------------------------------------------------------------------------------------------------------------------------------------------------------------------------------------------|

|                          |
|--------------------------|
| Semi-field tests         |
| No data.                 |
| Field studies            |
| No data.                 |
| Additional specific test |
| No data.                 |

**Effects on non-target soil meso- and macro fauna; effects on soil nitrogen transformation  
 (Regulation (EU) N° 283/2013, Annex Part A, points 8.4, 8.5, and Regulation (EU) N° 284/2013  
 Annex Part A, points 10.4, 10.5)**

| Test organism              | Test substance                      | Application method of test a.s./ OM <sup>1</sup> | Time scale | End point                                  | Toxicity               |
|----------------------------|-------------------------------------|--------------------------------------------------|------------|--------------------------------------------|------------------------|
| Earthworms                 |                                     |                                                  |            |                                            |                        |
|                            | Quartz sand (a.s.)/<br>Preparations |                                                  | Chronic    | Growth, reproduction, behaviour            | No data, not required. |
| Other soil macroorganisms  |                                     |                                                  |            |                                            |                        |
| <i>Folsomia candida</i>    | Quartz sand (a.s.)/<br>Preparations |                                                  |            | Mortality, reproduction, behaviour         | No data, not required. |
| <i>Hypoaspis aculeifer</i> | Quartz sand (a.s.)/<br>Preparations |                                                  |            | Mortality, growth, reproduction, behaviour | No data, not required. |

<sup>1</sup>To indicate whether the test substance was oversprayed/to indicate the organic content of the test soil (e.g. 5 % or 10 %).

|                                                       |
|-------------------------------------------------------|
| Higher tier testing (e.g. modelling or field studies) |
|-------------------------------------------------------|

|          |
|----------|
| No data. |
|----------|

|                         |                        |
|-------------------------|------------------------|
| Nitrogen transformation | No data, not relevant. |
|-------------------------|------------------------|

## Toxicity/exposure ratios for soil organisms

Risk assessment for all proposed uses of Quartz sand

Quartz sand is a natural ubiquitously occurring substance intended for a manual application onto trees. The applied active substance is expected to be indistinguishable from the natural soil due to its structural similarity. The calculation of Toxicity/Exposure Ratios (TERs) is therefore not considered necessary.

## Effects on terrestrial non target higher plants (Regulation (EU) N° 283/2013, Annex Part A, point 8.6 and Regulation (EU) N° 284/2013 Annex Part A, point 10.6)

Screening data

Quartz sand is a natural ubiquitously occurring substance intended for a manual application onto trees. It is very unlikely that quartz sand harms plants physiologically. Silicon is a plant nutrient, but since quartz is a very stable mineral and not soluble in water, the plant can get no benefit out of the application with quartz sand. Calculations of Predicted Environmental Rates (PER) and estimation of toxicity/exposure ratios (TERs) is not considered necessary.

Laboratory dose response tests

| Species | Test substance                      | ER <sub>50</sub> (g/ha) <sup>2</sup><br>vegetative<br>vigour | ER <sub>50</sub> (g/ha) <sup>2</sup><br>emergence | Exposure <sup>1</sup><br>(g/ha) <sup>2</sup> | TER | Trigger |
|---------|-------------------------------------|--------------------------------------------------------------|---------------------------------------------------|----------------------------------------------|-----|---------|
|         | Quartz sand (a.s.)/<br>Preparations | No data, not<br>required.                                    | No data, not<br>required.                         |                                              |     |         |

Extended laboratory studies: No data.

Semi-field and field test: No data

<sup>1</sup> explanation of how exposure has been estimated should be provided (e.g. based on Ganzelmeier drift data)

<sup>2</sup> for preparations indicate whether dose is expressed in units of a.s. or preparation

## Effects on biological methods for sewage treatment (Regulation (EU) N° 283/2013, Annex Part A, point 8.8)

| Test type/organism    | End point                                                                                                                                                                                                                                        |
|-----------------------|--------------------------------------------------------------------------------------------------------------------------------------------------------------------------------------------------------------------------------------------------|
| Activated sludge      | No data. Quartz sand is practically insoluble in water and chemically relatively inert. No inhibitory effects on aerobic waste water microorganisms are expected if the formulation is correctly used as a coating onto trees (manually applied) |
| <i>Pseudomonas sp</i> | No data                                                                                                                                                                                                                                          |

## Monitoring data (Regulation (EU) N° 283/2013, Annex Part A, point 8.9 and Regulation (EU) N° 284/2013, Annex Part A, point 10.8)

Available monitoring data concerning adverse effect of the a.s.  
No data.  
Available monitoring data concerning effect of the PPP.  
No data.

**Definition of the residue for monitoring (Regulation (EU) N° 283/2013, Annex Part A, point 7.4.2)  
Ecotoxicologically relevant compounds**

| Compartment |                                                 |
|-------------|-------------------------------------------------|
| soil        | A residue definition is not needed <sup>1</sup> |
| water       | A residue definition is not needed <sup>1</sup> |
| sediment    | A residue definition is not needed <sup>1</sup> |
| groundwater | A residue definition is not needed <sup>1</sup> |

<sup>1</sup> Quartz sand is a natural ubiquitously occurring substance. It is not possible to distinguish between the residues arising from the uses of Quartz sand as a plant protection product and its natural presence in environmental compartments.

**Classification and labelling with regard to ecotoxicological data (Regulation (EU) N° 283/2013, Annex Part A, Section 10)**

Substance

Quartz sand

Harmonised classification according to Regulation (EC) No 1272/2008 and its Adaptations to Technical Process [Table 3.1 of Annex VI of Regulation (EC) No 1272/2008 as amended]<sup>4</sup>:

No current harmonised classification

According to the peer review, criteria for harmonised classification according to Regulation (EC) No 1272/2008 may be met for:

None

<sup>4</sup> Regulation (EC) No 1272/2008 of the European Parliament and of the Council of 16 December 2008 on classification, labelling and packaging of substances and mixtures, amending and repealing Directives 67/548/EEC and 1999/45/EC, and amending Regulation (EC) No 1907/2006. OJ L 353, 31.12.2008, 1-1355.
